# Supplementary material
Source: PubMed Central journal article supplement (PMC3507147)

## Supplementary Methods

### *Clinical samples*

All newly diagnosed leukemia patients at Lucile Packard Children's Hospital are asked to donate extra bone marrow from the diagnostic material for research studies. From that bank, we selected samples that were available in reverse chronological order reasoning that more recent samples would have an increased probability of having viable cells. No other criteria were used to include or exclude samples.

### *Flow cytometry and cell sorting*

Aside from 5 samples that were only available as DNA, we performed cell sorting on all evaluable samples. BMMCs were incubated with the following antibodies from Invitrogen, BioLegend or eBiosciences for analysis by flow cytometry and cell sorting: anti-CD19-Qdot605 (clone SJ25-C1), anti-CD10-FITC (clone HI10a), anti-CD45-PE (clone HI30), anti-CD38-PE/Cy7 (clone HIT2), anti-CD81-PerCP/eFluor710 (clone 1D6), anti-CD34-Alexa647 (clone 581) and anti-CD20-APC/eFluor780 (clone 2H7). Following incubation, cells were washed and suspended in PBS/2FBS containing 4',6-diamidino-2-phenylindole (DAPI) to enable exclusion of non-viable cells. Cells were acquired and sorted using a FACSAria (BD Biosciences) instrument. From each patient sample, normal B-cells and up to two ALL leukemic populations, termed 'malignant 1' and 'malignant 2', were sorted. Normal B-cells were always defined as CD45<sup>+</sup>CD10<sup>-</sup>CD19<sup>+</sup>CD20<sup>+</sup>. ALL leukemic cells were defined on a patient-by-patient basis at the time of sorting (see Supplemental Table 2 for marker phenotypes of each sorted population from each

patient). Sorted cells were pelleted and lysed in RLT Plus buffer for nucleic acid isolation. Analysis of flow cytometry data files was performed using FlowJo (Ashland, OR).

### *IgH amplification and sequencing*

First stage primers were designed so as to allow for the amplification of all known alleles of the germline IgH sequences. To minimize the risk of not amplifying a specific clonotype sequence because of a somatic hypermutation at the primer hybridization site, we designed three sets of primers in the  $V_H$  segments. Therefore each  $V_H$  segment is amplified by 3 primers, decreasing the likelihood of somatic hypermutations interfering with amplification.

Primers were optimized such that each possible  $V_H$  and  $J_H$  segment was amplified at a similar rate so as to minimally skew the repertoire frequency distribution during the amplification process. Specificity of the primers was, in contrast, not optimized as the primer sequences could be mapped and removed from the eventual sequence read. Thus a given sequence may have been amplified by multiple primers. This methodology led to slightly different primer designs than have been published previously for similar IgH amplification approaches.<sup>1</sup> The numbers of primers and the positions of these primers are shown in Faham and Willis.<sup>2</sup>

At the 5' ends of  $V_H$  segment primers a universal sequence was appended. These sequences are complementary to a set of second stage PCR primers. Similarly the primers on the  $J_H$  side had a 5' tail with a universal sequence that is complementary to second stage PCR primers. The second stage PCR primers contained the sequence primer and the P5 sequence used for cluster formation in the Illumina Genome Analyzer sequencer. The primers on the  $V_H$

side of the amplification constituted one of a set of primers, each of which had a 3' region that annealed to the overhang sequence appended in the first reaction but which further contained one of multiple 6 base pair indices that allowed for sample multiplexing on the sequencer. Each of these primers further contained a 5' tail with the P7 sequence used for cluster formation in the Illumina Genome Analyzer sequencer.

First stage PCR was carried out using a high fidelity polymerase (AccuPrime, Life Technologies) for 16 cycles. 1/100 of this amplification reaction was then used as the template for a second PCR reaction using the second stage primers including the primer containing a sample index that was unique to a particular sample. A second stage PCR was carried out for 22 cycles. Different samples were pooled to be sequenced in the same Illumina Genome Analyzer sequencing lane. The pool was then purified using the QIAquick PCR purification kit (Qiagen).

Cluster formation and sequencing was carried out per the manufacturer protocol (Illumina, Inc., La Jolla, CA). Specifically, three sequencing reactions were performed. First 115 bp were sequenced from the  $J_H$  side sufficient to sequence through the junctional sequence from  $J_H$  to  $V_H$ . At this point, the synthesized strand was denatured and washed off. A second sequencing primer was annealed that allowed the sample index to be sequenced for 6 cycles to identify the sample. At this point the reverse complement strand was generated per the Illumina protocol. A final sequencing read of 95 bp was obtained from the  $V_H$ - to- $J_H$  direction providing ample sequence to map the  $V_H$  segment accurately.

### *Clonotype determination*

After exclusion of low quality reads, sequence data were then analyzed to determine the clonotype sequences including mapping to germline  $V_H$  and  $J_H$  consensus sequences. First, the sample index sequences were used to identify which of the sequences originate from which of the pooled samples. Sequences whose index were not a perfect match to one of the indices used in a specific run were excluded. Next the forward read was used to map the  $J_H$  segment. Since all the sequences started from the same position of the  $J_H$  segments, all the  $J_H$  segments started at a predefined sequencing position. The first 25 bp of the  $J_H$  segments were used to map the  $J_H$  segment. Any read with more than 5 high quality mismatches to the known  $J_H$  segments was excluded from further analysis.

After  $J_H$  segment identification,  $V_H$  segments were mapped. The reverse read was used for this purpose. First, the  $V_H$  primer was mapped and excluded. Thereafter, the next 70 bases of the reverse read were mapped to the known  $V_H$  segments. Reads that did not map to  $J_H$  and  $V_H$  segments were excluded. The next step in mapping involved identifying the frame that related the forward and reverse reads and this allowed a continuous sequence from  $J_H$  to  $V_H$  to be constructed. This was done using the last 15 bases of the forward read which were reliably within the  $V_H$  segment regardless of NDN length. While these bases could be of relatively lower sequence quality as they were at the terminal end of a long read, they could be used to map within a single identified  $V_H$  segment in order to identify the position at which the two reads could be joined. Finally, the known  $V_H$  and  $J_H$  sequences to which the reads map were used to identify the point in the forward read at which the sequences at the junctions diverged from these mapped segments.

To generate a clonotype, at least two identical sequences needed to be identified. Given sequencing and PCR errors, many different but highly related clonotypes might originate from one clonotype. We therefore allowed for coalescence of highly related clonotypes. For example two sequences with one base difference but present at vastly different frequencies were consistent with sequencing or PCR error. On the other hand two sequences with two base differences and present at similar magnitudes were not likely to arise from sequencing error.

#### *Analytical methods – Effective NDN bases*

We assumed that each base of the NDN sequences was independently distributed with each base having a 25% probability of occurring. The NDN region was ordered from the end of the J<sub>H</sub> segment toward the V<sub>H</sub> segment, and we compared the number of consecutive matches. Six consecutive bases are required to reach significance at  $p=5 \times 10^{-4}$ . The bases in the D segment come from a limited number of available alleles and as such are clearly dependent on each other. Analysis of 8235 clonotypes from one of the CLL controls using the IMGT JunctionAnalysis tool showed a 6% probability of any two clonotypes sharing a D segment. This roughly corresponded to the probability of matching 2 consecutive bases (1/16 or 0.0625), so the D segment is compressed as 2 effective NDN bases.

## Supplementary Table Legends

**Table S1. Patient characteristics.**

**Table S2. Flow cytometry summary.**

**Table S3. Evolution by index clonotype.** Each row refers to a specific index clone. Related index clones in individual patients are noted by gray-shading. The index clone  $J_H$  and  $V_H$  segments and NDN sequence are indicated. The effective NDN (column E) is described in the supplementary methods. The frequencies (columns F-I) of the specific index clone in different cell populations are indicated. The J column indicates the number of clonotypes evolving from the index clone as well as their percentage of all clones in the sample. The frequency of these evolved clones in different cell populations are indicated in columns K-N.

**Supplemental Table S4. Upstream and downstream  $V_H$  replacement in evolved clonotypes.**

## References

1. van Dongen JJ, Langerak AW, Bruggemann M, et al. Design and standardization of PCR primers and protocols for detection of clonal immunoglobulin and T-cell receptor gene recombinations in suspect lymphoproliferations: report of the BIOMED-2 Concerted Action BMH4-CT98-3936. *Leukemia*. 2003;17(12):2257-2317.
2. M. Faham, T. D. Willis. Monitoring health and disease status using clonotype profiles. United States Patent application 2011/0207134A1, published August 25, 2011.

## Supplementary Tables

**Table S1. Patient characteristics.**

| Patient ID | Down Syndrome | Age at Diagnosis | Initial WBC | CNS | Cytogenetics                                               | NCI Risk Group       | day 29 flow MRD | Relapse (Y/N) |
|------------|---------------|------------------|-------------|-----|------------------------------------------------------------|----------------------|-----------------|---------------|
| 1          |               | 11               | 499         | 2   | Normal                                                     | high-risk            | <0.1%           | Y             |
| 2          |               | 4                | 12          | 1   | Normal                                                     | standard-risk        | ND              | N             |
| 3          |               | 3                | 3           | 1   | Hyperdiploidy without concurrent trisomies #4, #10 and #17 | standard-risk        | <0.1%           | N             |
| 4          |               | 4                | 6           | 2   | TEL-AML                                                    | standard-risk        | <0.1%           | N             |
| 5          |               | 3                | 106         | 1   | TEL-AML                                                    | high-risk            | <0.1%           | N             |
| 6          |               | 5                | 9           | 1   | Hyperdiploidy without concurrent trisomies #4, #10 and #17 | standard-risk        | <0.1%           | N             |
| 7          |               | 2                | 9           | 1   | TEL-AML                                                    | standard-risk        | <0.1%           | N             |
| 8          |               | 5                | 8           | 1   | hyperdiploid; +4, +10,+17 and TEL-AML                      | standard-risk        | <0.1%           | N             |
| 9          |               | 4                | 36          | 2   | TEL-AML                                                    | standard-risk        | <0.1%           | N             |
| 10         |               | 8                | 2           | 2   | hyperdiploid; +4, +10, +17                                 | standard-risk        | <0.1%           | N             |
| 11         |               | 2                | 58          | 1   | TEL-AML                                                    | high-risk            | <0.1%           | N             |
| 12         |               | 7                | 51          | 2   | Not done                                                   | high-risk            | ND              | Y             |
| 13         |               | 4                | 4           | 1   | TEL-AML                                                    | standard-risk        | <0.1%           | N             |
| 14         |               | 2                | 107         | 1   | Other                                                      | high-risk            | <0.1%           | N             |
| 15         |               | 3                | 0.5         | 1   | TEL-AML                                                    | standard-risk        | <0.1%           | N             |
| 16         |               | 4                | 43          | 1   | hyperdiploid; +4, +10, +17                                 | standard-risk        | <0.1%           | N             |
| 17         |               | 3                | 9           | 1   | hyperdiploid; +4, +10, +17                                 | standard-risk        | <0.1%           | N             |
| 18         |               | 4                | 6           | 1   | Other                                                      | standard-risk        | <0.1%           | N             |
| 19         |               | 14               | 24          | 1   | TEL-AML                                                    | high-risk            | <0.1%           | N             |
| 20         |               | 2                | 19          | 1   | TEL-AML                                                    | standard-risk        | <0.1%           | N             |
| 21         |               | 9                | 9           | 1   | Normal                                                     | standard-risk        | <0.1%           | N             |
| 22         |               | 17               | 902         | 3   | Other                                                      | high-risk            | >1%             | Y             |
| 23         |               | 6                | 48          | 1   | Normal                                                     | standard-risk        | <0.1%           | N             |
| 24         |               | 14               | 135         | 2   | Ph+ (9:22)                                                 | very high-risk (pH+) | ND              | N             |
| 25         |               | 12               | 3           | 1   | Other                                                      | high-risk            | <0.1%           | N             |
| 26         |               | 4                | 30          | 1   | Other                                                      | standard-risk        | >0.1%, <1%      | N             |



|    |   |      |     |   |                                                           |                            |            |   |
|----|---|------|-----|---|-----------------------------------------------------------|----------------------------|------------|---|
| 27 |   | 4    | 12  | 1 | Hyperdiploid without concurrent trisomies #4, #10 and #17 | standard-risk              | <0.1%      | N |
| 28 |   | 17   | 4   | 1 | Hyperdiploid clone concurrent trisomies #4, #10, #17      | standard-risk              | <0.1%      | N |
| 29 |   | 3    | 5   | 1 | TEL-AML                                                   | standard-risk              | <0.1%      | N |
| 30 |   | 8    | 4   | 1 | Normal                                                    | standard-risk              | >0.1%, <1% | N |
| 31 |   | 15   | 7   | 1 | Hyperdiploid without concurrent trisomies #4, #10 and #17 | high-risk                  | <0.1%      | N |
| 32 |   | 5    | 17  | 1 | hyperdiploid; +4, +10, +17                                | standard-risk              | ND         | N |
| 33 |   | 5    | 19  | 2 | Other                                                     | standard-risk              | <0.1%      | N |
| 34 |   | 9    | 110 | 1 | Ph+ (9:22)                                                | very high-risk (pH+)       | ND         | N |
| 35 |   | 5    | 75  | 1 | TEL-AML                                                   | high-risk                  | <0.1%      | N |
| 36 |   | 3    | 3   | 1 | Hyperdiploid without concurrent trisomies #4, #10 and #17 | standard-risk              | <0.1%      | N |
| 37 |   | 2    | 34  | 1 | hyperdiploid; +4, +10, +17                                | standard-risk              | <0.1%      | N |
| 38 |   | 17   | 56  | 1 | Other                                                     | high-risk                  | <0.1%      | N |
| 39 |   | 4    | 2   | 1 | Hyperdiploid without concurrent trisomies #4, #10 and #17 | standard-risk              | <0.1%      | N |
| 40 |   | 0.75 | 880 | 2 | MLL (4:11)                                                | MLL rearranged infant BALL | ND         | N |
| 41 | Y | 18   | 135 | 2 | Normal (except Tri21)                                     | high-risk                  | >1%        | N |
| 42 |   | 9    | 6   | 1 | Hyperdiploid without concurrent trisomies #4, #10 and #17 | standard-risk              | <0.1%      | N |
| 43 |   | 14   | 844 | 2 | Other                                                     | high-risk                  | ND         | Y |
| 44 |   | 3    | 11  | 1 | Hyperdiploid without concurrent trisomies #4, #10 and #17 | standard-risk              | >1%        | N |
| 45 | Y | 6    | 5   | 1 | Hyperdiploid without concurrent trisomies #4, #10 and #17 | standard-risk              | <0.1%      | N |
| 46 |   | 6    | 11  | 1 | TEL-AML                                                   | standard-risk              | >0.1%, <1% | N |
| 47 |   | 14   | 10  | 1 | Other                                                     | high-risk                  | >1%        | N |
| 48 |   | 12   | 75  | 1 | Hyperdiploid without concurrent trisomies #4, #10 and #17 | high-risk                  | <0.1%      | Y |
| 49 |   | 15   | 2   | 1 | hyperdiploid; +4, +10, +17                                | high-risk                  | >0.1%, <1% | N |
| 50 |   | 2    | 17  | 1 | TEL-AML                                                   | standard-risk              | <0.1%      | N |
| 51 |   | 13   | 2   | 1 | Normal                                                    | high-risk                  | <0.1%      | N |

**Table S2. Flow cytometry summary.**

| Patient ID | % viable cells (DAPI-negative; low scatter) | INPUT # of cells (Unsorted) | Total mapped sequencing reads (Unsorted) | # of normal B-cells | % normal B-cells (of viable) | % ALL (CD45low CD10+; of viable) | mal1 phenotype    | # of mal1 sorted | % mal1 (of ALL population) | mal2 phenotype    | # of mal2 sorted | % mal2 (of ALL population) |
|------------|---------------------------------------------|-----------------------------|------------------------------------------|---------------------|------------------------------|----------------------------------|-------------------|------------------|----------------------------|-------------------|------------------|----------------------------|
| 1          | 29                                          | 2,324,088                   | 366,600                                  | 168                 | 2.1                          | 9.04                             | CD45lowCD10-      | 2,028,913        | 82.2                       | CD45lowCD10+      | 167,205          | 7.1                        |
| 2          | 35.1                                        | 233,068                     | 151,274                                  | 7,878               | 3.2                          | 0.431                            | CD45lowCD10+CD81+ | 1,524            | 58.3                       | CD45lowCD10+CD81- | 588              | 23.3                       |
| 3          | 30.6                                        | 193,033                     | 946,895                                  | 11,743              | 7.1                          | 55.4                             | CD45lowCD10+CD20- | 77,193           | 97.4                       | CD45lowCD10+CD20+ | 1,803            | 2.3                        |
| 4          | 6.16                                        | 1,031                       | 25,802                                   | NOT sorted          | 8.8                          | 4.05                             | NOT sorted        |                  |                            | NOT sorted        |                  |                            |
| 5          | 30.5                                        | 1,271,478                   | 1,529,916                                | 25,623              | 2.9                          | 74.7                             | CD45lowCD10+CD34- | 1,844,792        | 74.6                       | CD45lowCD10+CD34+ | 460,188          | 19.2                       |
| 6          | 49.2                                        | 532,867                     | 2,230,162                                | 9,828               | 2.1                          | 81.7                             | CD45lowCD10+      | 242,354          | 31.3                       | CD45-CD10+        | 341,639          | 43.2                       |
| 9          | 43.8                                        | 1,039,865                   | 1,572,475                                | 21,739              | 1.5                          | 77.6                             | CD45lowCD10+CD34- | 955,901          | 65.1                       | CD45lowCD10+CD34+ | 490,401          | 34                         |
| 10         | 45.4                                        | 711,548                     | 1,486,112                                | 6,802               | 0.7                          | 72.5                             | CD45-CD10+        | 547,346          | 70.4                       | CD45lowCD10+      | 36,988           | 4.8                        |
| 11         | 14.6                                        | 30,065                      | 10,372                                   | 207                 | 1.3                          | 0                                | CD45+CD20-CD19-   | 10,542           | 78.7                       | CD45+CD20-CD19+   | 1,826            | 14                         |
| 12         | 12.4                                        | 16,511                      | 1,144,307                                | 0                   | 0                            | 89.6                             | CD45lowCD10+CD81+ | 3,273            | 63.1                       | CD45lowCD10+CD81- | 1,894            | 36.3                       |
| 13         | 11.4                                        | 70,926                      | 203,734                                  | 1,821               | 8.4                          | 1.11                             | CD45lowCD10-/+    | 1,285            | 100                        | NOT sorted        |                  |                            |
| 14         | 37.3                                        | 1,273,006                   | 3,823,441                                | 115,413             | 11.2                         | 79.7                             | CD45lowCD10+      | 860,349          | 59.3                       | CD45-CD10+        | 236,056          | 16.3                       |
| 15         | 38.1                                        | 383,631                     | 1,224,434                                | 8,653               | 1.3                          | 77.6                             | CD45lowCD10+CD34+ | 224,129          | 79.9                       | CD45lowCD10+CD34- | 53,908           | 19.3                       |
| 16         | 60.1                                        | 1,285,714                   | 1,432,888                                | 16,913              | 1.7                          | 67.6                             | CD45lowCD10+CD20+ | 646,469          | 53.5                       | CD45lowCD10+CD20- | 536,608          | 44.7                       |
| 17         | 3.5                                         | 101,834                     | 1,388,158                                | 1,895               | 21                           | 23.4                             | CD45lowCD10+CD20+ | 2,210            | 67.1                       | CD45lowCD10+CD20- | 1,025            | 31                         |
| 21         | 25                                          | 273,139                     | 3,700,394                                | 5,762               | 3.7                          | 76.7                             | CD45lowCD10+CD20+ | 74,066           | 50.4                       | CD45lowCD10+CD20- | 65,197           | 44.4                       |
| 22         | 67.3                                        | 2,204,516                   | 3,814,667                                | 2,036               | 0.1                          | 93.7                             | CD45lowCD10+CD20- | 2,419,690        | 42.7                       | CD45lowCD10+CD20+ | 1,691,163        | 30.4                       |
| 23         | 27.8                                        | 287,630                     | 2,510,472                                | 3,630               | 1.7                          | 52.7                             | CD45lowCD10+CD38+ | 74,524           | 50.9                       | CD45lowCD10+CD38- | 56,453           | 36.8                       |
| 24         | 41                                          | 517,362                     | 61,514                                   | 10,604              | 1.8                          | 87                               | CD45lowCD10+CD20- | 325,583          | 58.8                       | CD45lowCD10+CD20+ | 233,945          | 37.1                       |
| 25         | 58.3                                        | 495,173                     | 1,039,776                                | 1,333               | 0.1                          | 54.4                             | CD45lowCD10+CD20- | 864,473          | 82.4                       | CD45lowCD10+CD20+ | 169,566          | 17                         |
| 26         | 57.6                                        | 766,310                     | 1,423,941                                | 38,693              | 3.4                          | 82.5                             | CD45lowCD10+      | 681,813          | 46                         | CD45-CD10+        | 375,986          | 25.9                       |
| 27         | 44.5                                        | 94,441                      | 907,478                                  | 11,779              | 13.7                         | 57.3                             | CD45lowCD10+      | 51,763           | 49.8                       | CD45-CD10+        | 11,024           | 10.5                       |
| 28         | 56.3                                        | 34,071                      | 786,060                                  | 111                 | 0.2                          | 94.9                             | CD45lowCD10+CD20- | 39,586           | 66.1                       | CD45lowCD10+CD20+ | 19,268           | 32.2                       |
| 29         | 56.1                                        | 731,887                     | 956,595                                  | 79,723              | 5.5                          | 45.5                             | CD45lowCD10+CD20- | 313,524          | 65.5                       | CD45lowCD10+CD20+ | 154,037          | 32.3                       |
| 30         | 62                                          | 4,109,808                   | 1,120,684                                | 25,451              | 0.9                          | 55.5                             | CD45-CD10+        | 1,638,601        | 45.7                       | CD45lowCD10+      | 672,140          | 19.2                       |
| 31         | 12.3                                        | 224,013                     | 250,394                                  | 654                 | 1.9                          | 2.93                             | CD45lowCD10low    | 21,859           | 30.3                       | CD45-/lowCD10+    | 2,094            | 2.9                        |

|    |      |           |           |        |       |       |                   |           |      |                   |         |      |
|----|------|-----------|-----------|--------|-------|-------|-------------------|-----------|------|-------------------|---------|------|
| 32 | 51.8 | 674,209   | 1,422,995 | 19,652 | 2.2   | 92.5  | CD45lowCD10+      | 238,389   | 23.9 | CD45-CD10+        | 672,477 | 66.8 |
| 33 | 32.3 | 669,093   | 743,752   | 4,881  | 1.3   | 56.6  | CD45lowCD10++     | 201,290   | 36.4 | CD45lowCD10+      | 126,203 | 22.4 |
| 34 | 51.2 | 1,181,758 | 1,30,4184 | 23,160 | 1.3   | 92.4  | CD45lowCD10+CD20+ | 2,044,886 | 79.6 | CD45lowCD10+CD20- | 472,041 | 19.2 |
| 35 | 35   | 1,109,850 | 1,319,312 | 55,232 | 4.3   | 69.1  | CD45lowCD10+CD20- | 502,244   | 62   | CD45lowCD10+CD20+ | 286,977 | 35.9 |
| 36 | 32   | 42,434    | 398,735   | 6,418  | 21.7  | 31.5  | CD45lowCD10+      | 8,576     | 84.4 | CD45-CD10+        | 2,958   | 8.4  |
| 37 | 17.7 | 35,305    | 237,205   | 2,872  | 15.3  | 50.1  | CD45lowCD10+CD20- | 4,557     | 53.3 | CD45lowCD10+CD20+ | 3,832   | 44.7 |
| 38 | 47.8 | 1,071,429 | 1,433,991 | 5,696  | 0.6   | 91.1  | CD45lowCD10+      | 792,248   | 61   | CD45-CD10+        | 333,365 | 25.9 |
| 39 | 8.4  | 215,566   | 1,173,519 | 60     | 0.2   | 61.8  | CD45-CD10+        | 18,970    | 52.5 | CD45lowCD10+      | 5,922   | 16.5 |
| 40 | 42.8 | 4,742,090 | 1,344,122 | 47,407 | 3.9   | 0.646 | CD45lowCD10-      | 1,119,569 | 48.8 | CD45lowCD10+      | 20,060  | 0.7  |
| 41 | 51.8 | 3,114,843 | 235,941   | 10,748 | 0.3   | 97.8  | CD45+CD10+        | 963,654   | 29.3 | CD45lowCD10+      | 620,389 | 20   |
| 42 | 53   | 554,740   | 1,517,738 | 4,907  | 0.9   | 90.8  | CD45-CD10+        | 555,229   | 75.2 | CD45lowCD10+      | 71,440  | 9.7  |
| 43 | 58.9 | 741,701   | 1,283,825 | 6      | 0.002 | 94.9  | CD45lowCD10+CD34- | 1,423,570 | 92.6 | CD45lowCD10+CD34+ | 44,215  | 3    |
| 44 | 52.9 | 2,094,325 | 1,751,011 | 34,262 | 2.6   | 82.9  | CD45-CD10+        | 1,283,992 | 65.8 | CD45lowCD10+      | 300,647 | 15.8 |
| 45 | 45.5 | 761,356   | 1,490,199 | 3,145  | 0.5   | 50.3  | CD45lowCD10+      | 342809    | 40.5 | CD45lowCD10low    | 25817   | 3    |
| 46 | 25.1 | 369,189   | 394,627   | 1,099  | 0.4   | 93.5  | CD45lowCD10+CD20- | 192,611   | 86.4 | CD45lowCD10+CD20+ | 27,916  | 12.5 |
| 47 | 36.8 | 470,142   | 1,387,823 | 1,489  | 0.9   | 52.8  | CD45lowCD10+CD81+ | 253,696   | 75.3 | CD45lowCD10+CD81- | 64,024  | 19.7 |
| 48 | 39.6 | 344,951   | 1,592,498 | 2,224  | 0.9   | 88.9  | CD45lowCD10+CD34+ | 119,415   | 37.1 | CD45lowCD10+CD34- | 167,542 | 52.5 |
| 49 | 50.4 | 969,010   | 1,440,857 | 10,115 | 0.8   | 93.9  | CD45lowCD10+      | 613,087   | 43.4 | CD45-CD10+        | 553,427 | 39.2 |
| 50 | 45.5 | 835,928   | 919,046   | 56,654 | 4.4   | 66.1  | CD45lowCD10+CD34- | 605,581   | 77.8 | CD45lowCD10+CD34+ | 144,941 | 18.9 |
| 51 | 40.4 | 181,202   | 73,049    | 2,484  | 1.2   | 80.2  | CD45lowCD10+CD34+ | 116,628   | 80.1 | CD45lowCD10+CD34- | 23,418  | 16.2 |

Input # of cells (unsorted) indicates the total number of cell equivalent that were used in the IgH DNA amplification reaction.

Table S3. Evolution by index clonotype.

| Patient ID | DC J-segment allele | DC V-segment allele | NDNsequence                                                              | Number of effective NDN bases | Frequency (%) of reads mapping to index clone | Frequency (%) in sort for normal B-cells | Frequency (%) in first gate for malignant cells | Frequency (%) in second gate for malignant cells | Total # (and %) non-index evolved clones | Total read frequency of evolved clones (%) | Total read frequency of evolved clones in sort for normal B-cells (%) | Total read frequency of evolved clones in first gate for malignant cells (%) | Total read frequency of evolved clones in second gate for malignant cells (%) |
|------------|---------------------|---------------------|--------------------------------------------------------------------------|-------------------------------|-----------------------------------------------|------------------------------------------|-------------------------------------------------|--------------------------------------------------|------------------------------------------|--------------------------------------------|-----------------------------------------------------------------------|------------------------------------------------------------------------------|-------------------------------------------------------------------------------|
| 3          | IGHJ5*02            | IGHV1-2*02          | ACGAGTCAACGCTCGAGTAGCAGCT<br>ACCACCACTACAACCG                            | 19                            | 90.3                                          | 0.5                                      | 98.3                                            | 83.3                                             | 14 (0.3%)                                | 0.08                                       | 0                                                                     | 0.2                                                                          | 0                                                                             |
| 5          | IGHJ4*02            | IGHV2-26*01         | AACTCCCCGAACCATAGTAGCCC                                                  | 6                             | 75.9                                          | 3                                        | 93.7                                            | 41.1                                             | 25 (1.2%)                                | 0.01                                       | 0                                                                     | 0.005                                                                        | 0.03                                                                          |
| 5          | IGHJ4*02            | IGHV3-30-3*01       | AAAGATCCCCAGTTAGCCATATCGG<br>GGGGCCTTATCTCCTAGG                          | 34                            | 10.2                                          | 0.1                                      | 1.4                                             | 21.1                                             | 613 (30.5%)                              | 0.7                                        | 0.05                                                                  | 0.09                                                                         | 1.8                                                                           |
| 5          | IGHJ3*02            | IGHV3-30-3*01       | TGGGCTTCGTCCATC                                                          | 7                             | 9.6                                           | 0.1                                      | 4.1                                             | 32.7                                             | 30 (1.5%)                                | 0.03                                       | 0                                                                     | 0.03                                                                         | 0.1                                                                           |
| 6          | IGHJ5*02            | IGHV1-17*02         | ATATAACCAGTCAAAAACGGAGAAAG<br>GAAA                                       | NA                            | 33.3                                          | 0.1                                      | 2.2                                             | 35.7                                             | 3 (0.2%)                                 | 0.003                                      | 0                                                                     | 0.007                                                                        | 9.00E-04                                                                      |
| 6          | IGHJ5*02            | IGHV4-31*03         | ATATAACCAGTCAAAAATATCCCCTC                                               | 9                             | 9.2                                           | 0.2                                      | 43.5                                            | 2.6                                              | 2 (0.1%)                                 | 0.002                                      | 0                                                                     | 0.006                                                                        | 7.00E-04                                                                      |
| 6          | IGHJ5*02            | IGHV1-14*01         | CAGAAAAGGGAGAG                                                           | 10                            | 18.3                                          | 0.09                                     | 2                                               | 25                                               | 22 (1.5%)                                | 0.04                                       | 0                                                                     | 0.003                                                                        | 0.05                                                                          |
| 6          | IGHJ5*02            | IGHV3-13*01         | ACGGCGAGCTGCTATATGCCTCG                                                  | 14                            | 10.5                                          | 0.2                                      | 50                                              | 3.1                                              | 1 (0.07%)                                | 8.00E-04                                   | 0                                                                     | 0.003                                                                        | 0                                                                             |
| 6          | IGHJ5*02            | IGHV6-1*01          | CCCTCCACATAAGCAGCTGGTACTA<br>CGACCCTCC                                   | 18                            | 9.4                                           | 0.07                                     | 0.8                                             | 18                                               | 857 (59.9%)                              | 13.6                                       | 0.08                                                                  | 0.7                                                                          | 11.1                                                                          |
| 7          | IGHJ6*02            | IGHV3-64*01         | TAACTCCCCGAACCATTCTAATCTC<br>TCCCCCGTCTCGCGGCC                           | 24                            | 88.7                                          | NA                                       | NA                                              | NA                                               | 25 (3.4%)                                | 0.4                                        | NA                                                                    | NA                                                                           | NA                                                                            |
| 8          | IGHJ4*02            | IGHV2-70*01         | TAACCACTACTATCATACTTTCCCTG<br>GGG                                        | 14                            | 78.7                                          | NA                                       | NA                                              | NA                                               | 279 (57.6%)                              | 1.4                                        | NA                                                                    | NA                                                                           | NA                                                                            |
| 8          | IGHJ4*02            | IGHV3-30-3*01       | TAACCACTACTATCATAGTATCCAC                                                | 7                             | 17.3                                          | NA                                       | NA                                              | NA                                               | 22 (4.5%)                                | 0.1                                        | NA                                                                    | NA                                                                           | NA                                                                            |
| 9          | IGHJ4*02            | IGHV3-11*01         | TCCATCTCCCGGCCCTCGA                                                      | 11                            | 63.2                                          | 3.6                                      | 52.1                                            | 58.1                                             | 42 (8.8%)                                | 0.1                                        | 0                                                                     | 0.06                                                                         | 0.1                                                                           |
| 9          | IGHJ6*02            | IGHV3-15*01         | GGGAGGGTAGTAATAACCACTACTA<br>TCATAGTAATACGTCCCTT                         | 15                            | 34.9                                          | 3.7                                      | 46.7                                            | 40.7                                             | 0 (0.0%)                                 | 0                                          | 0.02                                                                  | 0                                                                            | 0                                                                             |
| 10         | IGHJ4*02            | IGHV2-5*01          | CAGTAGTCACCGTAGAGCCCAAGCC<br>CT                                          | 16                            | 47                                            | 0.1                                      | 40.9                                            | 33.4                                             | 2 (0.8%)                                 | 4.00E-04                                   | 0                                                                     | 7.00E-04                                                                     | 0.006                                                                         |
| 10         | IGHJ5*02            | IGHV3-30-3*01       | TGATGGCCTGGGGCAAGCTACCACC<br>ACTACAACACGGACCCCTTCTGAAC<br>CTC            | 38                            | 30.6                                          | 0.2                                      | 33.5                                            | 33.2                                             | 12 (4.6%)                                | 0.04                                       | 0                                                                     | 0.06                                                                         | 0.07                                                                          |
| 10         | IGHJ5*02            | IGHV3-43*01         | TGATGGCCTGGGGCAAGCACTCCC                                                 | 17                            | 21.7                                          | 0.1                                      | 25.4                                            | 32.6                                             | 15 (5.7%)                                | 0.06                                       | 0                                                                     | 0.08                                                                         | 0.08                                                                          |
| 12         | IGHJ5*02            | IGHV1-3*01          | TCTCGGCCACTCCAAAAATCGTAAT<br>GGAGGGGTGAAG                                | 20                            | 53.1                                          | NA                                       | 50.3                                            | 51.3                                             | 8 (40.0%)                                | 0.08                                       | NA                                                                    | 0                                                                            | 0                                                                             |
| 12         | IGHJ4*02            | IGHV5-51*01         | CTCCCCGAACCATAGTAACCCTACC                                                | 9                             | 46.4                                          | NA                                       | 49.3                                            | 48                                               | 4 (20.0%)                                | 0.02                                       | NA                                                                    | 0                                                                            | 0                                                                             |
| 14         | IGHJ6*02            | IGHV4-31*03         | GGAGTCTTGGTAA                                                            | 6                             | 92.8                                          | 0.2                                      | 98.1                                            | 97.8                                             | 22 (0.3%)                                | 1                                          | 0                                                                     | 0.7                                                                          | 0.7                                                                           |
| 15         | IGHJ4*02            | IGHV4-59*08         | GGGGTCCCTTGGACTCACCGTAGG<br>AGGGG                                        | 23                            | 22.9                                          | 0.2                                      | 18.2                                            | 10.6                                             | 3930 (83.5%)                             | 12.8                                       | 0                                                                     | 12.9                                                                         | 14.6                                                                          |
| 15         | IGHJ4*02            | IGHV4-59*01         | GGGGTCCCTTGGACTCACCGTT                                                   | 18                            | 20.6                                          | 0.3                                      | 31                                              | 38                                               | 3930 (83.5%)                             | 12.8                                       | 0                                                                     | 12.9                                                                         | 14.6                                                                          |
| 15         | IGHJ4*02            | IGHV3-64*01         | GGGGTCCCTTGGACTCACCGTCCCT<br>TCGG                                        | 19                            | 16.9                                          | 13.6                                     | 19.3                                            | 27.1                                             | 2121 (45.1%)                             | 9                                          | 0                                                                     | 8.5                                                                          | 7.8                                                                           |
| 15         | IGHJ4*02            | IGHV4-59*08         | GGGGTCCCTTGGACTCACCCCTA<br>GCC                                           | 19                            | 13                                            | 0                                        | 7.4                                             | 0.8                                              | 3930 (83.5%)                             | 12.8                                       | 0                                                                     | 12.9                                                                         | 14.6                                                                          |
| 15         | IGHJ4*02            | IGHV3-64*01         | GGGGTCCCTTGGACTCACCGTAGG<br>AGGGGTCCCC                                   | 29                            | 5.1                                           | 0                                        | 3.9                                             | 2.4                                              | 2121 (45.1%)                             | 9                                          | 0                                                                     | 8.5                                                                          | 7.8                                                                           |
| 16         | IGHJ6*02            | IGHV3-33*01         | TAGCAGCTGGTACTACTACAATATC<br>ACCCCCGGGAAACGA<br>ACATAGCAATCACACGGGGGCCAA | 19                            | 63                                            | 4.6                                      | 67.4                                            | 66.7                                             | 2 (0.4%)                                 | 0.09                                       | 0                                                                     | 0.1                                                                          | 0.2                                                                           |
| 16         | IGHJ4*02            | IGHV3-23*03         | TCTATAGCAGCTGGTACTACCGCTC<br>CA                                          | 36                            | 35.4                                          | 2.1                                      | 31.9                                            | 32.6                                             | 2 (0.4%)                                 | 0.009                                      | 0                                                                     | 0.005                                                                        | 0.004                                                                         |

|    |          |               |                                                                    |    |      |      |      |      |              |          |      |          |       |
|----|----------|---------------|--------------------------------------------------------------------|----|------|------|------|------|--------------|----------|------|----------|-------|
| 17 | IGHJ6*02 | IGHV1-3*01    | TCACGCCAGTAGGAGGGTC                                                | 11 | 39   | 0    | 42.3 | 42.1 | 11 (2.0%)    | 0.01     | 0    | 0        | 0     |
| 17 | IGHJ5*02 | IGHV4-4*02    | GTGGGGACC                                                          | 2  | 35.9 | 0    | 34.7 | 34.8 | 0 (0.0%)     | 0        | 0    | 0        | 0     |
| 17 | IGHJ1*01 | IGHV3-13*04   | CCTACTCCAGCTGCTGTATAAGG<br>TGG                                     | 15 | 23.8 | 0    | 22.1 | 21.8 | 2 (0.4%)     | 4.00E-04 | 0    | 0        | 0     |
| 18 | IGHJ5*02 | IGHV7-4-1*01  | GTAATAACTCCCCGAACCATAGTAC<br>CCATCTCTCAGGATG                       | 19 | 58.8 | NA   | NA   | NA   | 366 (42.8%)  | 15.2     | NA   | NA       | NA    |
| 18 | IGHJ5*02 | IGHV2-5*10    | GTAATAACTCCCCGAACCATAGTAC<br>CCATCTCTCAGGATGCTCGATAGGA<br>GGCCTGT  | 36 | 7.7  | NA   | NA   | NA   | 143 (16.7%)  | 3.1      | NA   | NA       | NA    |
| 18 | IGHJ5*02 | IGHV3-11*01   | GTAATAACTCCCCGAACCATAGTAC<br>CCATCTCTCAGGATAGCC                    | 22 | 5.5  | NA   | NA   | NA   | 335 (39.1%)  | 14.6     | NA   | NA       | NA    |
| 19 | IGHJ4*02 | IGHV2-5*03    | ATAATAACCAGTCAAAATATCGTAA<br>TACGGGCTACGGCGGGA                     | NA | 75.2 | NA   | NA   | NA   | 0 (0.0%)     | 0        | NA   | NA       | NA    |
| 20 | IGHJ6*03 | IGHV4-30-2*01 | GCCCAAGACCAGTCAAAATATCGTC                                          | 10 | 49.7 | NA   | NA   | NA   | 89 (5.8%)    | 0.7      | NA   | NA       | NA    |
| 20 | IGHJ6*03 | IGHV3-30-3*01 | GCCCAAGACCAGTCAAAATATCGTC<br>CTCCCGT                               | 18 | 9.2  | NA   | NA   | NA   | 63 (4.1%)    | 0.4      | NA   | NA       | NA    |
| 20 | IGHJ4*02 | IGHV3-30*18   | ACTACCGGGTCCAGGGGCCAA                                              | 12 | 30.2 | NA   | NA   | NA   | 371 (24.1%)  | 1.7      | NA   | NA       | NA    |
| 21 | IGHJ4*02 | IGHV5-a*01    | ATGGA                                                              | 5  | 97.3 | 0.2  | 98.1 | 94.4 | 0 (0.0%)     | 0        | 0    | 0        | 0     |
| 22 | IGHJ5*02 | IGHV3-21*01   | GCGTTCAGTTGTTCCCAAAC                                               | 8  | 96.4 | 41.5 | 94.3 | 99   | 35 (18.1%)   | 3.1      | 0.4  | 5.2      | 0.7   |
| 23 | IGHJ4*02 | IGHV3-13*01   | CCGTCCAGCCACTGCTATCT                                               | 6  | 30.3 | 0.03 | 9    | 39.2 | 2475 (32.4%) | 22       | 0    | 17.7     | 38.8  |
| 23 | IGHJ4*02 | IGHV3-30*02   | CCGTCCAGCCACTGCTATCCGCTG<br>A                                      | 11 | 21.3 | 0    | 35.4 | 2    | 125 (1.6%)   | 0.1      | 0    | 0.1      | 0.2   |
| 23 | IGHJ4*02 | IGHV3-20*01   | CCGTCCAGCCACTGCTATCTTCTT<br>GCCCCCTCCTCA                           | 23 | 13.2 | 0    | 23.9 | 1.3  | 2457 (32.1%) | 18       | 0    | 15.8     | 29.5  |
| 25 | IGHJ5*02 | IGHV3-30*18   | GCCTATTCTGCTGGTAGCGACCTT                                           | 15 | 99.9 | 8.4  | 99.9 | 99.9 | 7 (12.7%)    | 0.005    | 0    | 0.002    | 0     |
| 26 | IGHJ4*02 | IGHV1-3*01    | CGAGCTGCCTCGAGGGCC                                                 | 12 | 59.1 | 0.8  | 61.7 | 59.5 | 37 (1.5%)    | 0.04     | 0    | 0.03     | 0.04  |
| 26 | IGHJ4*02 | IGHV3-23*01   | AGGAGCAGCTGGTACTACTACAATA<br>TCCTAGGGG                             | 11 | 38.2 | 0.8  | 37.9 | 40   | 159 (6.6%)   | 0.1      | 0    | 0.1      | 0.1   |
| 27 | IGHJ6*02 | IGHV3-33*01   | GGACTTCATAATAACCACTCCAAAA<br>ATCGTAAG                              | 10 | 57.7 | 0    | 56.4 | 59.4 | 0 (0.0%)     | 0        | 0    | 0        | 0     |
| 27 | IGHJ4*02 | IGHV3-7*01    | TCGCCAGCCACTGCTATACGCGAGC<br>TCCCTAGA                              | 20 | 39.4 | 0    | 39.4 | 40.5 | 22 (1.3%)    | 0.02     | 0    | 0.007    | 0     |
| 28 | IGHJ6*02 | IGHV1-69*04   | CGAATCTTTCGAACGTAGTAATAAC<br>CACTACTCCCTAAAGAGA                    | 27 | 37.8 | NA   | 36.9 | 37.3 | 8 (4.4%)     | 0.005    | NA   | 0.006    | 0.002 |
| 28 | IGHJ6*02 | IGHV4-4*01    | CGAATCTTTCGAACGTAGTAATAAC<br>CACTACTATCATAG                        | 16 | 25.2 | NA   | 24.6 | 24.2 | 9 (4.9%)     | 0.005    | NA   | 0.006    | 0.003 |
| 28 | IGHJ6*04 | IGHV3-21*01   | GGCATAGCAGCTGGTACTACTACAA<br>TAGAAA                                | 6  | 35.6 | NA   | 37   | 36.9 | 0 (0.0%)     | 0        | NA   | 9.00E-04 | 0.005 |
| 29 | IGHJ6*02 | IGHV1-3*02    | TTCGGGG                                                            | 3  | 50.9 | 0.09 | 70.4 | 65.5 | 0 (0.0%)     | 0        | 0    | 0        | 0     |
| 29 | IGHJ4*02 | IGHV3-30*03   | TAATAACCAGTCAAAATATCGTAAT<br>CCGTCCCCA<br>GGGGAGGTCCAGTTATACCCAATC | 12 | 12.3 | 0.1  | 4.4  | 3    | 1 (0.01%)    | 0.001    | 0    | 0        | 0     |
| 29 | IGHJ5*02 | IGHV1-8*01    | CGGGGATCGGGCAGCTGGTACTACT<br>ACCCCGAC                              | 43 | 8.4  | 0.3  | 6.4  | 8.1  | 16 (0.2%)    | 0.02     | 0    | 0.01     | 0.007 |
| 30 | IGHJ5*02 | IGHV4-34*01   | CCCCTCGTATATAGCATACACCAT<br>TAGTACAATAAAGGCGTGAGGATCT<br>CCC       | 30 | 93.1 | 5    | 96.3 | 90   | 18 (2.9%)    | 2.8      | 0.07 | 2.1      | 6.9   |
| 31 | IGHJ5*02 | IGHV3-11*01   | CCTTCCTTTAATAACTCCCCGAACC<br>ATAGTAATGC                            | 12 | 38.8 | 0    | NA   | 1    | 0 (0.0%)     | 0        | 0    | NA       | 0     |
| 31 | IGHJ4*02 | IGHV3-11*01   | CCCACACGGTATTTGCAACTCCC<br>GAACCTCTCTATCTTTGCCCA                   | 37 | 38.1 | 0    | NA   | 0    | 4 (0.4%)     | 0.05     | 0    | NA       | 0     |
| 32 | IGHJ4*02 | IGHV1-17*01   | AGTAGCAGCTACCACCACTACCCTA<br>GGAGAA                                | NA | 49.9 | 0.2  | 50.7 | 50.5 | 11 (1.4%)    | 0.006    | 0.09 | 0.02     | 0.02  |
| 32 | IGHJ4*02 | IGHV3-47*01   | AGTAGCAGCTACCACCACTACAATA<br>TCCTCATC                              | 6  | 49.1 | 0.2  | 49.2 | 49.4 | 9 (1.2%)     | 0.005    | 0    | 0.02     | 0.02  |
| 33 | IGHJ3*02 | IGHV3-41*01   | GAACATAACTCCCCGAACCTCCC                                            | NA | 66.6 | 0.4  | 99.7 | 98.9 | 3 (0.3%)     | 0.001    | 0    | 0        | 0     |

|    |          |             |                                                  |    |      |      |      |      |              |          |      |          |          |
|----|----------|-------------|--------------------------------------------------|----|------|------|------|------|--------------|----------|------|----------|----------|
| 34 | IGHJ5*02 | IGHV1-2*02  | CGGTGAGG                                         | NA | 85.4 | 6.9  | 86   | 85.2 | 0 (0.0%)     | 0        | 0    | 0        | 0.05     |
| 34 | IGHJ4*02 | IGHV1-46*01 | ACCGTGCCCTTTATCCCCAGTTGC<br>CTCTCG               | 21 | 14.1 | 0.6  | 13.9 | 14.7 | 0 (0.0%)     | 0        | 0.02 | 0        | 0        |
| 35 | IGHJ6*02 | IGHV3-23*01 | GCTCCCACTAAGTCAGGAA                              | 11 | 48.7 | 0.8  | 56.8 | 53.7 | 1020 (24.4%) | 1.6      | 0.02 | 1.5      | 1.1      |
| 35 | IGHJ3*02 | IGHV3-13*03 | CGAGCTGCTAGATTGGGTC                              | 11 | 14.7 | 0.2  | 10.1 | 9.9  | 129 (3.1%)   | 0.1      | 0    | 0.2      | 0.1      |
| 36 | IGHJ4*02 | IGHV1-3*02  | CATGTCCTCCCCAGTTTAGGGGGA<br>ATG                  | 21 | 22.4 | 0    | 95.6 | 98   | 0 (0.0%)     | 0        | 0    | 0        | 0        |
| 38 | IGHJ5*02 | IGHV3-30*18 | GTAGTTCCAGCCCCG                                  | 7  | 65.5 | 3.2  | 60.1 | 58.7 | 154 (13.4%)  | 0.3      | 0    | 0.2      | 0.09     |
| 38 | IGHJ6*02 | IGHV3-13*01 | GGGATCCGGGCGACCCCATTTTC<br>GGCGATGGCT            | NA | 31.5 | 1.5  | 37.4 | 39.5 | 0 (0.0%)     | 0        | 0    | 0        | 7.00E-04 |
| 39 | IGHJ4*02 | IGHV4-34*01 | CTGCTCCAT                                        | 3  | 99   | NA   | 99.8 | 99.3 | 0 (0.0%)     | 0        | NA   | 0        | 0        |
| 40 | IGHJ4*02 | IGHV3-13*01 | GCTCGCCAGCTGCTGTATACC                            | 7  | 84.9 | 1.8  | 89.4 | 89.7 | 24 (0.3%)    | 0.02     | 0    | 0.02     | 0.03     |
| 42 | IGHJ6*02 | IGHV6-1*01  | CAGCTGGTACTACTACCCGGACCCC<br>AC                  | 13 | 56   | 1.2  | 58.5 | 55.6 | 4 (3.4%)     | 0.001    | 0    | 6.00E-04 | 0        |
| 42 | IGHJ5*02 | IGHV2-5*10  | ACCCGGGGACGTACCAGCTGCTGCT<br>ATAGGGGGGGTCTGT     | 24 | 43.2 | 0.9  | 40.8 | 43.7 | 1 (0.8%)     | 1.00E-04 | 0.1  | 0        | 0        |
| 43 | IGHJ4*02 | IGHV3-74*01 | TGGGGGGTATTGACCAGTCAAATA<br>TCGTAAGAAGCTCGCGGGA  | 22 | 58.1 | NA   | 52.1 | 49.3 | 2 (8.7%)     | 0.02     | NA   | 0.004    | 0.1      |
| 43 | IGHJ6*03 | IGHV3-13*01 | GGGGACAGAGGGCCACTCCAAAAA<br>TCGTAATACCTCGGTCTCGA | 23 | 40.8 | NA   | 46.5 | 48.9 | 0 (0.0%)     | 0        | NA   | 0        | 0.006    |
| 44 | IGHJ5*02 | IGHV3-23*03 | CCTTAGCGA                                        | 4  | 73.9 | 0.8  | 70.2 | 60.4 | 0 (0.0%)     | 0        | 0    | 0        | 0        |
| 44 | IGHJ4*02 | IGHV3-23*03 | AGAGGGGTAAGTAATAACCAAGTCAA<br>AATAGTA            | 16 | 25.2 | 0.6  | 29.8 | 39.5 | 3 (0.8%)     | 3.00E-04 | 0.03 | 0        | 5.00E-04 |
| 45 | IGHJ4*02 | IGHV3-11*01 | CCCAAGGGATAGCAGTACCACCAC<br>TCACACGGCTT          | 18 | 71.7 | 0.6  | 62.6 | 2.6  | 5 (0.3%)     | 0.01     | 0    | 0.02     | 0        |
| 45 | IGHJ6*02 | IGHV3-21*01 | AGCCCCA                                          | 4  | 8.2  | 0    | 16.5 | 0.1  | 0 (0.0%)     | 0        | 0    | 0        | 0        |
| 46 | IGHJ6*02 | IGHV1-69*01 | TAATAACCACTCCAAAAATTACCTT<br>ACCCCCGACGC         | NA | 94.6 | 2.1  | 97.8 | 97.5 | 0 (0.0%)     | 0        | 0    | 0        | 0        |
| 47 | IGHJ4*02 | IGHV3-64*02 | CCCTATACCACTACTATCATAGTAA<br>TACCCA              | 11 | 98.5 | 1.5  | 99.7 | 99.8 | 60 (5.1%)    | 0.2      | 0    | 0.2      | 0.04     |
| 48 | IGHJ6*02 | IGHV3-13*01 | CGAATGTGTACCAGCTGCTGCTATA                        | 9  | 29.1 | 0.5  | 29.9 | 30.8 | 0 (0.0%)     | 0        | 0    | 0        | 0        |
| 48 | IGHJ4*02 | IGHV1-3*02  | TAACCACTACTATCATAGTAATACA<br>CCAA                | 7  | 24.3 | 1    | 24   | 24.1 | 3 (3.6%)     | 0.004    | 0    | 0.01     | 0.003    |
| 48 | IGHJ4*02 | IGHV3-11*04 | TCGTACCCACCCTGGACGAGCTGCT<br>ATACTCGGA           | 18 | 23.9 | 1.3  | 23.7 | 22.3 | 7 (8.4%)     | 0.003    | 0    | 0.003    | 8.00E-04 |
| 48 | IGHJ5*02 | IGHV3-7*01  | ACCATCGCAGCTATTTGAAGA                            | 13 | 22.5 | 0.5  | 22.2 | 22.6 | 20 (24.1%)   | 0.02     | 0    | 0.02     | 0.02     |
| 49 | IGHJ4*02 | IGHV3-33*01 | CCTCCCAAAGTACCAGCCACTGCGA<br>GA                  | 15 | 99   | 0.7  | 99.7 | 99.2 | 4 (0.6%)     | 7.00E-04 | 0    | 2.00E-04 | 0.003    |
| 50 | IGHJ3*02 | IGHV1-3*02  | GCCCTATCCCCGTAGAGGC                              | 10 | 74.6 | 0.8  | 85.6 | 44.5 | 2632 (40.3%) | 7        | 0.1  | 9.1      | 5.3      |
| 50 | IGHJ3*02 | IGHV2-5*10  | GCCCTATCCCCGTAGAGGCCTCCCC<br>CAGGGTCTGT          | 26 | 6.9  | 0.06 | 0.3  | 44.3 | 2224 (34.0%) | 4.3      | 0.07 | 5.6      | 3.8      |
| 51 | IGHJ6*03 | IGHV3-33*01 | ATACGGTATAGCTACGGAGTACCCG<br>A                   | 20 | 5.8  | 0    | 39.5 | 39.8 | 4 (0.5%)     | 5        | 0    | 1.2      | 12.4     |

**Table S4. Upstream and downstream V<sub>H</sub> replacement in evolved clonotypes.**

| <b>Patient ID</b> | <b>Clone</b> | <b>Number of evolved clonotypes with V segment 3' compared to index clone V segment</b> | <b>Number of evolved clonotypes with V segment 5' compared to index clone V segment</b> | <b>Number of evolved clonotypes where V segment cannot be compared to index clone V segment</b> |
|-------------------|--------------|-----------------------------------------------------------------------------------------|-----------------------------------------------------------------------------------------|-------------------------------------------------------------------------------------------------|
| 3                 | 1            | 0                                                                                       | 15                                                                                      | 1                                                                                               |
| 5                 | 1            | 1                                                                                       | 23                                                                                      | 1                                                                                               |
| 5                 | 2            | 0                                                                                       | 0                                                                                       | 613                                                                                             |
| 5                 | 3            | 0                                                                                       | 0                                                                                       | 30                                                                                              |
| 6                 | 1            | 0                                                                                       | 3                                                                                       | 0                                                                                               |
| 6                 | 2            | 0                                                                                       | 22                                                                                      | 0                                                                                               |
| 6                 | 3            | 0                                                                                       | 1                                                                                       | 0                                                                                               |
| 6                 | 4            | 0                                                                                       | 2                                                                                       | 0                                                                                               |
| 6                 | 5            | 0                                                                                       | 853                                                                                     | 4                                                                                               |
| 7                 | 1            | 1                                                                                       | 24                                                                                      | 0                                                                                               |
| 8                 | 1            | 257                                                                                     | 20                                                                                      | 2                                                                                               |
| 8                 | 2            | 0                                                                                       | 0                                                                                       | 22                                                                                              |
| 9                 | 1            | 0                                                                                       | 42                                                                                      | 0                                                                                               |
| 9                 | 2            | 0                                                                                       | 0                                                                                       | 0                                                                                               |
| 10                | 1            | 0                                                                                       | 1                                                                                       | 1                                                                                               |
| 10                | 2            | 0                                                                                       | 0                                                                                       | 12                                                                                              |
| 10                | 3            | 2                                                                                       | 9                                                                                       | 4                                                                                               |
| 12                | 1            | 0                                                                                       | 6                                                                                       | 2                                                                                               |
| 12                | 2            | 2                                                                                       | 2                                                                                       | 0                                                                                               |
| 14                | 1            | 9                                                                                       | 13                                                                                      | 0                                                                                               |
| 15                | 1            | 317                                                                                     | 1803                                                                                    | 3                                                                                               |
| 15                | 2            | 287                                                                                     | 3642                                                                                    | 3                                                                                               |
| 15                | 3            | 287                                                                                     | 3642                                                                                    | 3                                                                                               |
| 15                | 4            | 287                                                                                     | 3642                                                                                    | 3                                                                                               |
| 15                | 5            | 317                                                                                     | 1803                                                                                    | 3                                                                                               |
| 16                | 1            | 0                                                                                       | 2                                                                                       | 0                                                                                               |
| 16                | 2            | 0                                                                                       | 1                                                                                       | 1                                                                                               |
| 17                | 1            | 0                                                                                       | 10                                                                                      | 1                                                                                               |

|    |   |     |      |     |
|----|---|-----|------|-----|
| 17 | 2 | 0   | 2    | 0   |
| 17 | 3 | 0   | 0    | 0   |
| 18 | 1 | 0   | 0    | 366 |
| 18 | 2 | 1   | 139  | 3   |
| 18 | 3 | 264 | 68   | 3   |
| 19 | 1 | 0   | 0    | 0   |
| 20 | 1 | 0   | 0    | 89  |
| 20 | 2 | 14  | 320  | 37  |
| 20 | 3 | 0   | 0    | 63  |
| 21 | 1 | 0   | 0    | 0   |
| 22 | 1 | 3   | 32   | 0   |
| 23 | 1 | 48  | 2404 | 23  |
| 23 | 2 | 35  | 87   | 3   |
| 23 | 3 | 149 | 2285 | 23  |
| 25 | 1 | 0   | 7    | 0   |
| 26 | 1 | 0   | 31   | 6   |
| 26 | 2 | 0   | 159  | 0   |
| 27 | 1 | 0   | 0    | 0   |
| 27 | 2 | 0   | 22   | 0   |
| 28 | 1 | 6   | 2    | 0   |
| 28 | 2 | 0   | 0    | 0   |
| 28 | 3 | 0   | 9    | 0   |
| 29 | 1 | 0   | 0    | 0   |
| 29 | 2 | 0   | 1    | 0   |
| 29 | 3 | 0   | 16   | 0   |
| 30 | 1 | 6   | 12   | 0   |
| 31 | 1 | 0   | 4    | 0   |
| 31 | 2 | 0   | 0    | 0   |
| 32 | 1 | 0   | 9    | 0   |
| 32 | 2 | 2   | 11   | 0   |
| 33 | 1 | 1   | 2    | 0   |
| 34 | 1 | 0   | 0    | 0   |
| 34 | 2 | 0   | 0    | 0   |



|    |   |     |      |     |
|----|---|-----|------|-----|
| 35 | 1 | 17  | 916  | 87  |
| 35 | 2 | 2   | 123  | 4   |
| 36 | 1 | 0   | 0    | 0   |
| 38 | 1 | 2   | 76   | 76  |
| 38 | 2 | 0   | 0    | 0   |
| 39 | 1 | 0   | 0    | 0   |
| 40 | 1 | 2   | 22   | 0   |
| 42 | 1 | 0   | 1    | 0   |
| 42 | 2 | 0   | 4    | 0   |
| 43 | 1 | 2   | 0    | 0   |
| 43 | 2 | 0   | 0    | 0   |
| 44 | 1 | 0   | 0    | 0   |
| 44 | 2 | 0   | 3    | 0   |
| 45 | 1 | 0   | 5    | 0   |
| 45 | 2 | 0   | 0    | 0   |
| 46 | 1 | 0   | 0    | 0   |
| 47 | 1 | 10  | 50   | 0   |
| 48 | 1 | 0   | 0    | 0   |
| 48 | 2 | 0   | 7    | 0   |
| 48 | 3 | 0   | 20   | 0   |
| 48 | 4 | 0   | 3    | 0   |
| 49 | 1 | 0   | 4    | 0   |
| 50 | 1 | 11  | 2265 | 356 |
| 50 | 2 | 154 | 1714 | 356 |
| 51 | 1 | 3   | 0    | 1   |

Number of shared effective NDN bases with index clone  
by clones sharing same J segment

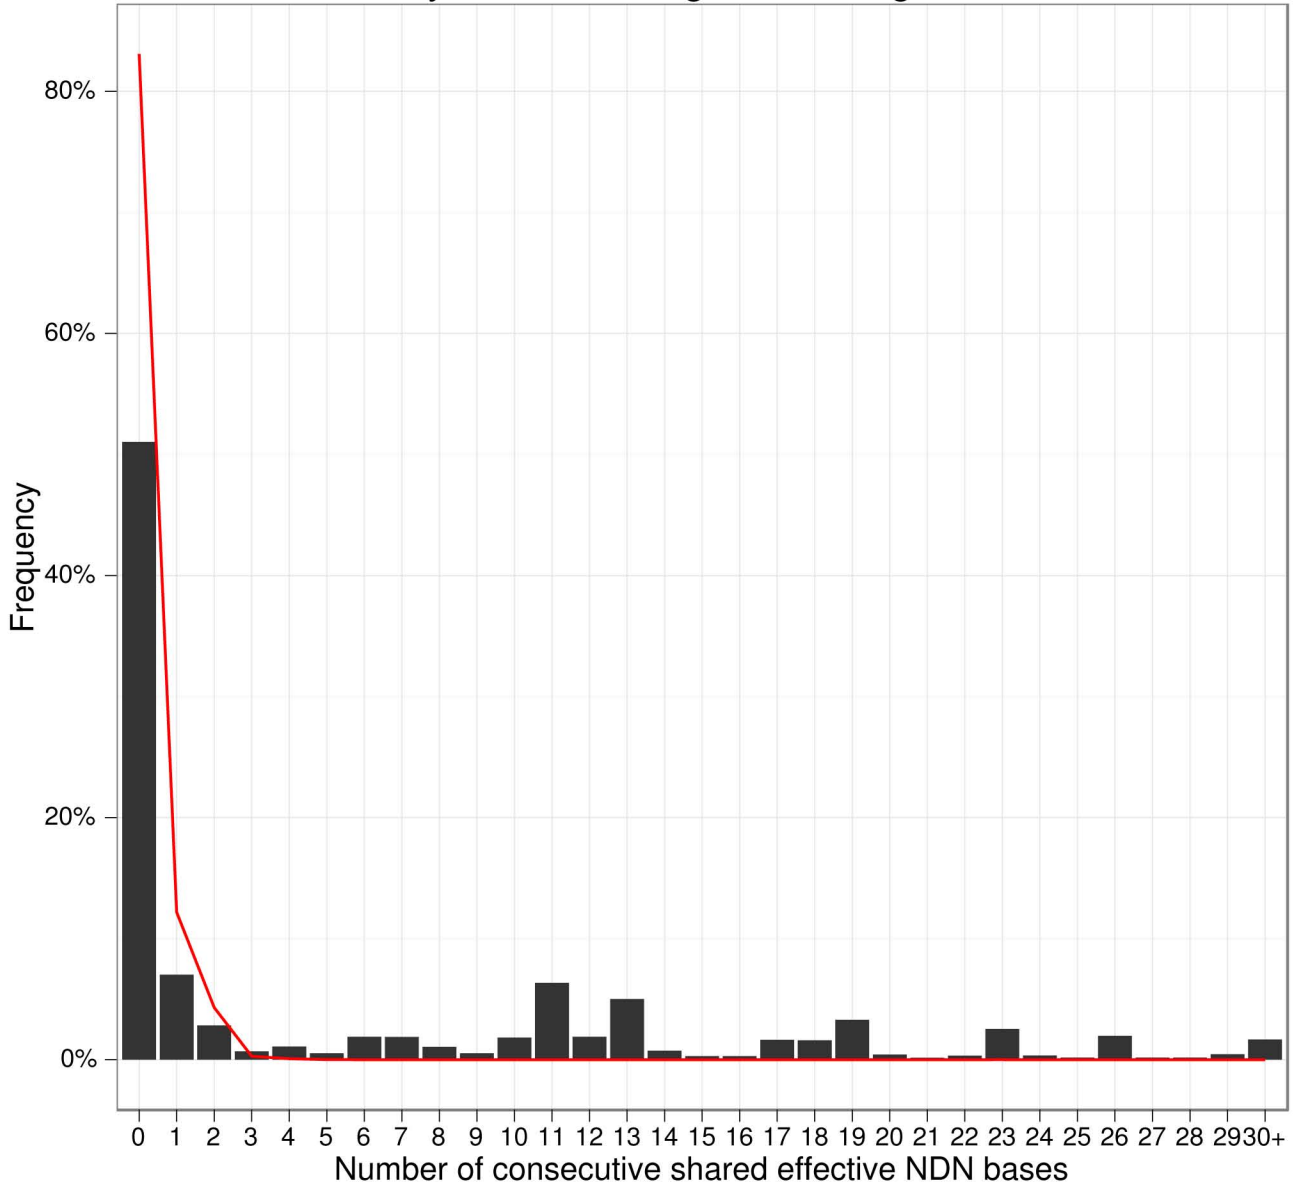

Supplement: supp_blood-2012-05-429811_blood-2012-05-429811-1.pdf [file supp_blood-2012-05-429811_blood-2012-05-429811-1.pdf]
